# Supplementary material
Source: PubMed Central journal article supplement (PMC2440657)

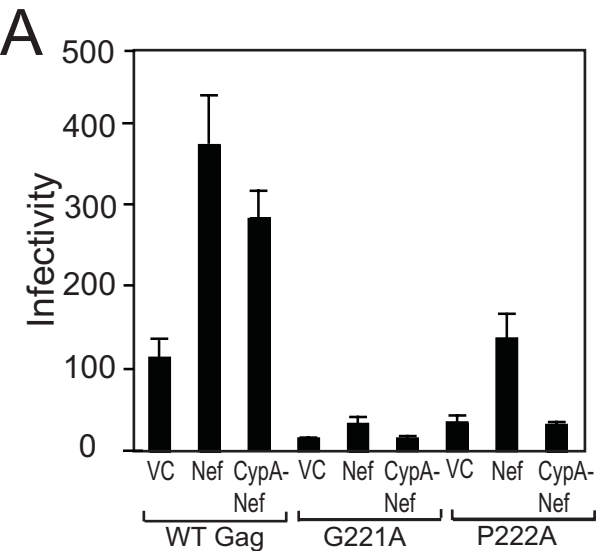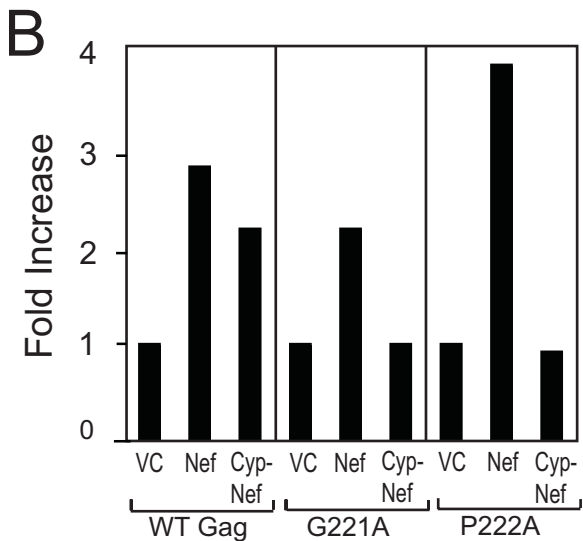

Supplement: NIHMS45165-supplement-01.pdf [file NIHMS45165-supplement-01.pdf]

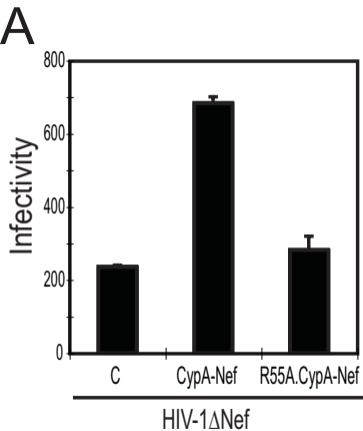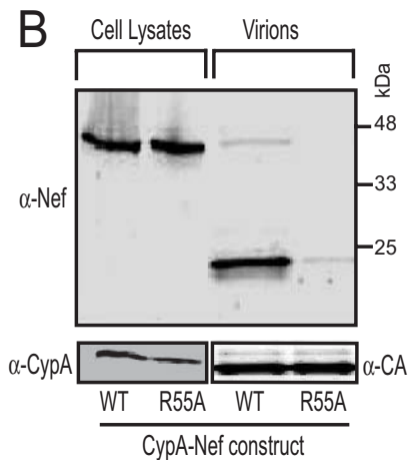

Supplement: NIHMS45165-supplement-02.pdf [file NIHMS45165-supplement-02.pdf]
